# Supplementary material for: Preparation and characterization of efavirenz cocrystal-encapsulated pronanoliposomes for antiretroviral therapy with improved bioavailability
Source: Royal Society of Chemistry journal article supplement (doi:10.1039/d4pm00215f), 2024-12-06
Supplement: d4pm00215f1.pdf [file d4pm00215f1.pdf]

### Drug release kinetic models of the experimental formulations

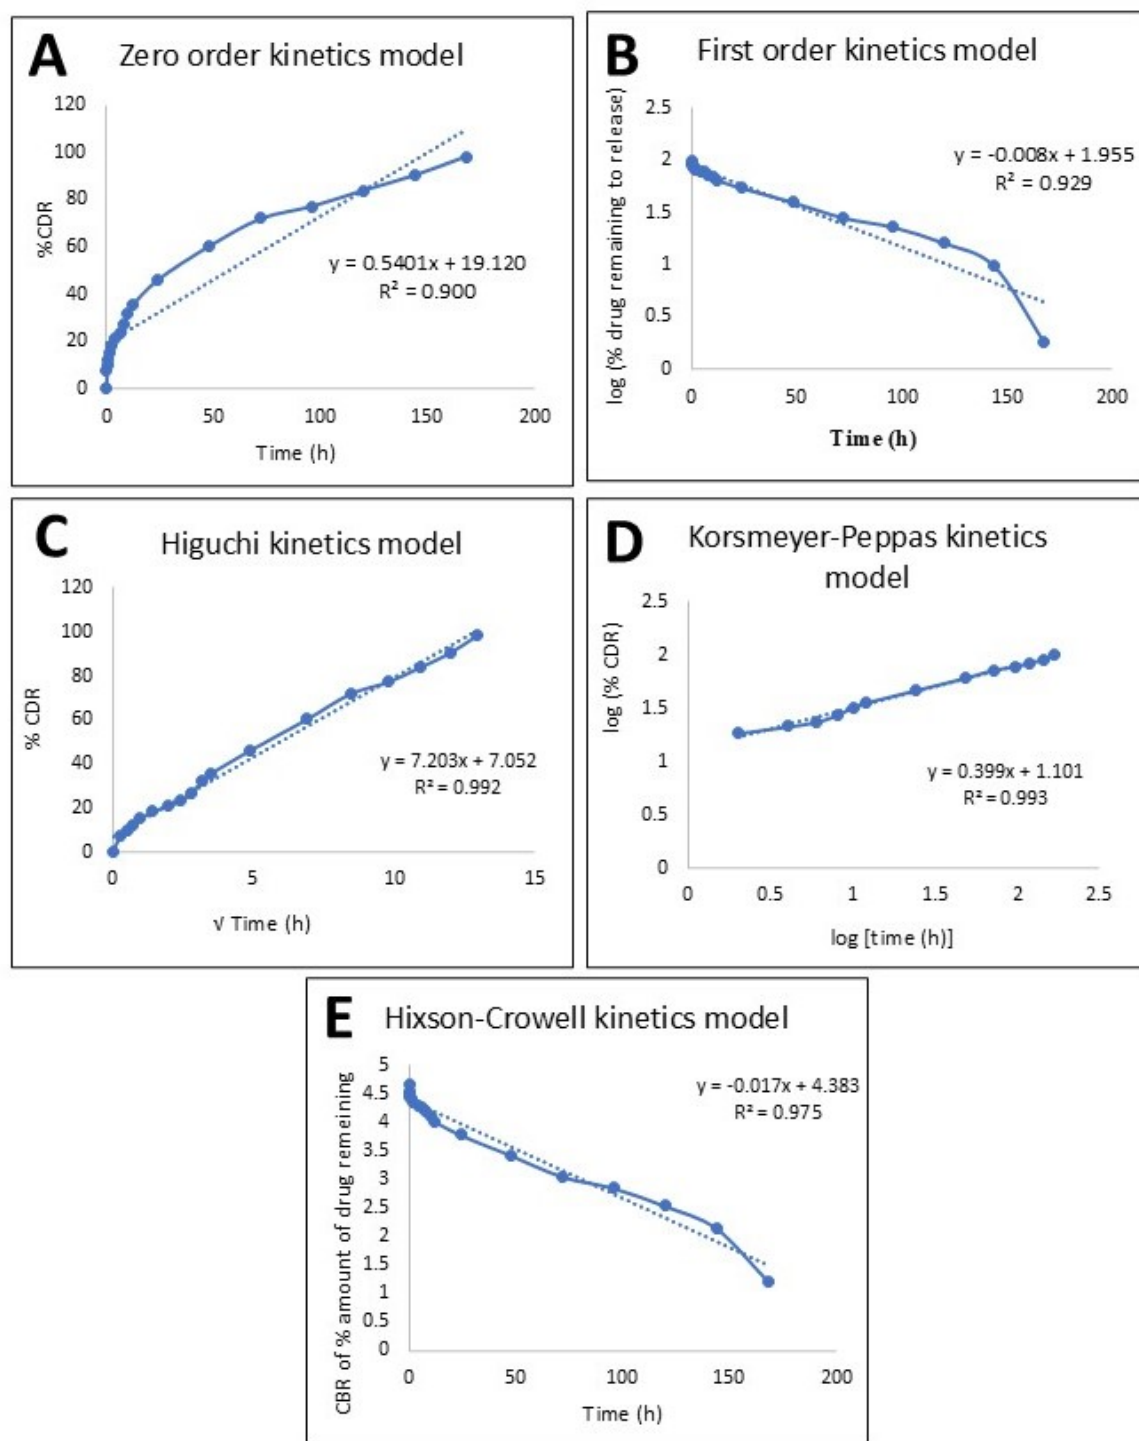

Figure S1: Drug release data of F5 formulation batch tested on (A) Zero order kinetics (B) First order kinetics (C) Higuchi kinetics (D) Korsmeyer-Peppas kinetics (E) Hixson-Crowell kinetics model.

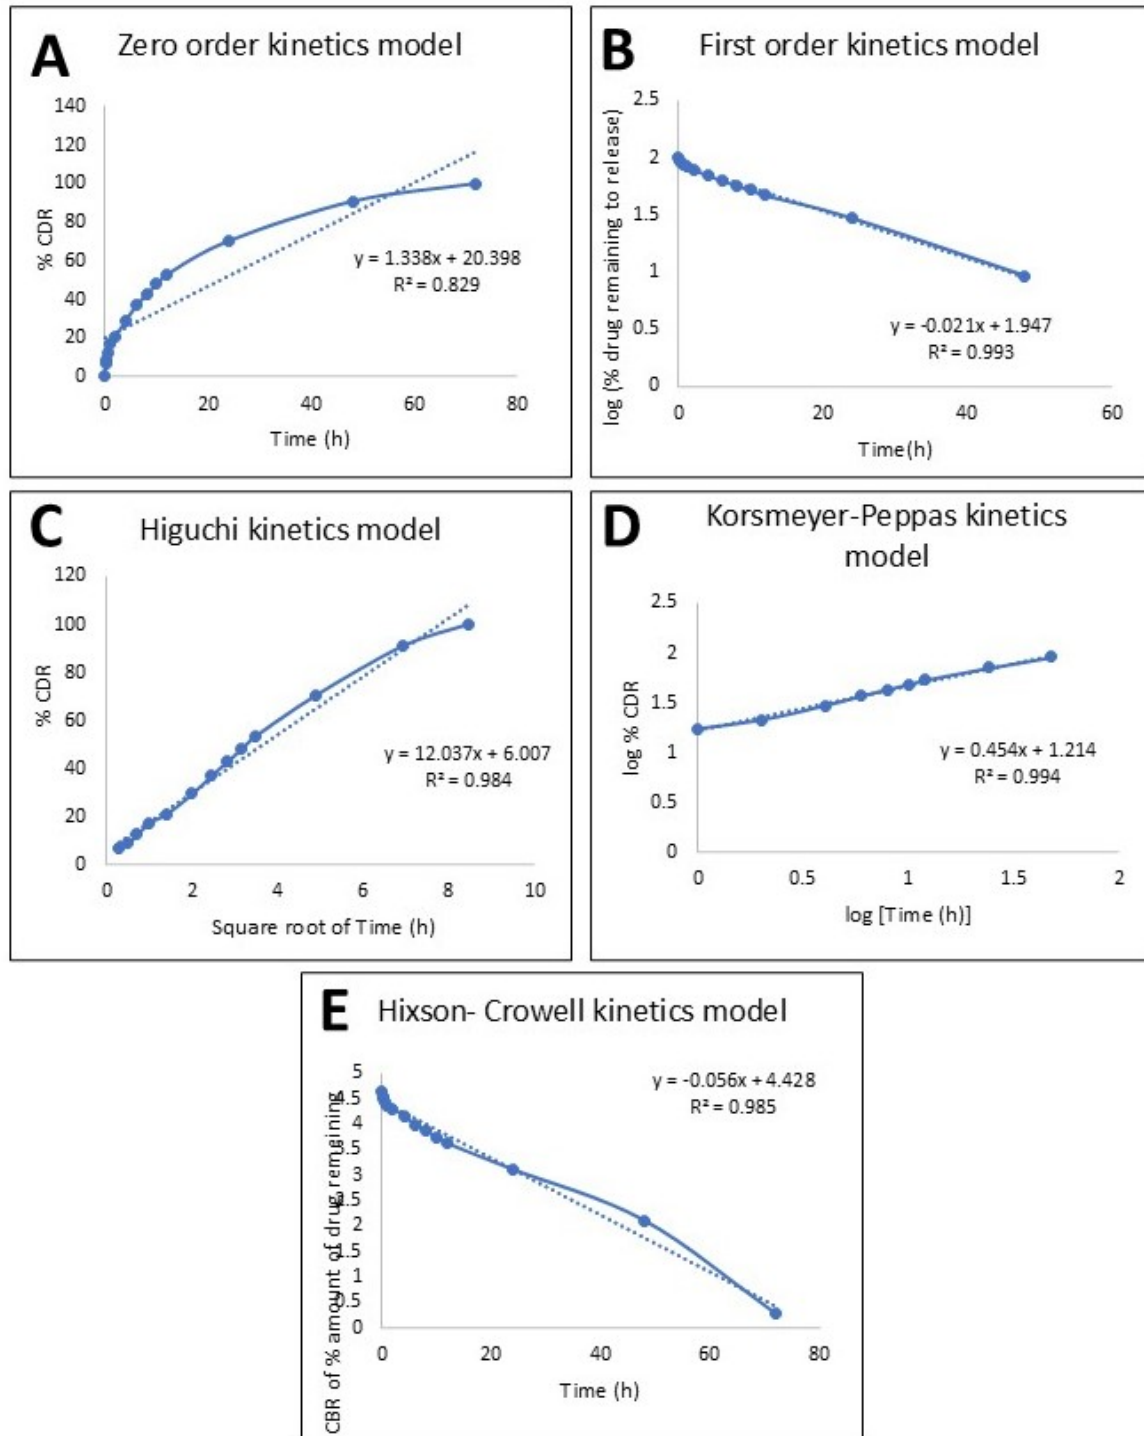

Figure S2: Drug release data of F6 formulation batch tested on (A) Zero order kinetics (B) First order kinetics (C) Higuchi kinetics (D) Korsmeyer-Peppas kinetics (E) Hixson-Crowell kinetics model.
